# Supplementary material for: Nitrogen- and sulfur-doped carbon nanoplatelets via thermal annealing of alkaline lignin with urea as efficient electrocatalysts for oxygen reduction reaction
Source: Royal Society of Chemistry journal article supplement (doi:10.1039/c6ra21958f), 2016-01-01
Supplement: c6ra21958f1.pdf [file c6ra21958f1.pdf]

## Supplementary Material

### **Nitrogen- and Sulfur-doped Carbon Nanoplatelets via Thermal Annealing Alkaline Lignin with Urea as Efficient Electrocatalysts for Oxygen Reduction Reaction**

**Xianlei Zhang, Dingling Yu, Yaqing Zhang, Wenhui Guo, Xiuxiu Ma,**

**Xingquan He\***

*Department of Chemistry and Chemical Engineering, Changchun University of  
Science and Technology, Changchun 130022, P. R. China.*

---

\* Corresponding author. Tel.+86-431-85583430  
E-mail address:hexingquan@hotmail.com (Xing-Quan He);

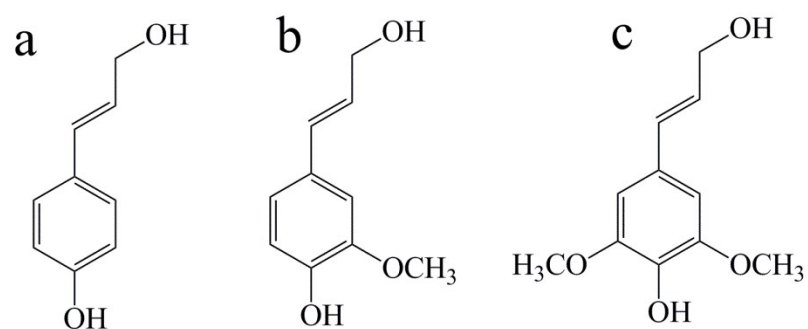

**Fig. S1** The three common monolignols: p-coumaraldehyde (a), coniferyl alcohol (b) and sinapyl alcohol (c).

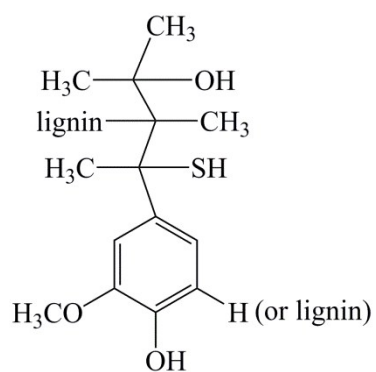

**Fig. S2** Molecular structure of alkaline lignin (AL) used in this work.

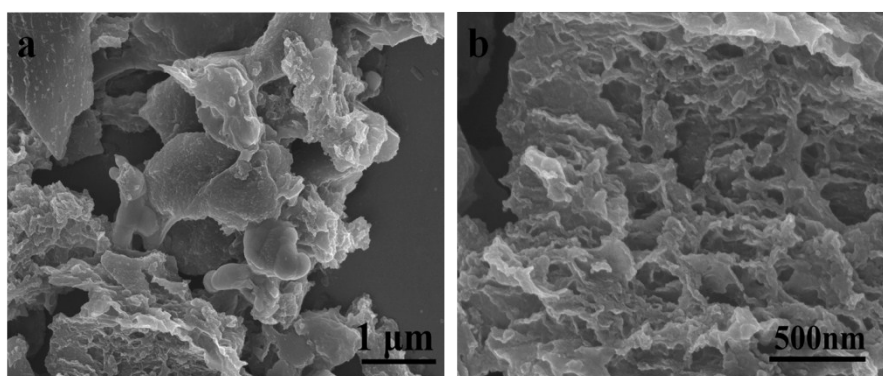

**Fig. S3** SEM images of N-S-C 900 with different magnifications.

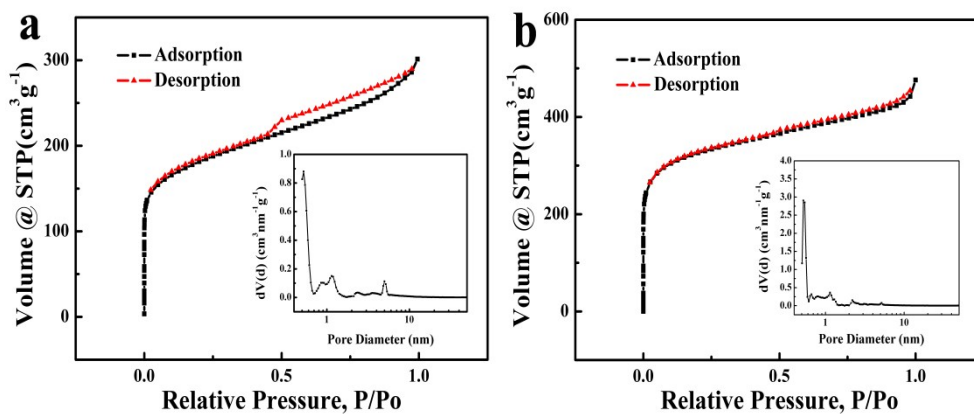

Fig. S4 Nitrogen adsorption/desorption isotherms of S-C 900 (a), N-S-C 900 (b) and its corresponding pore size distribution (inset).

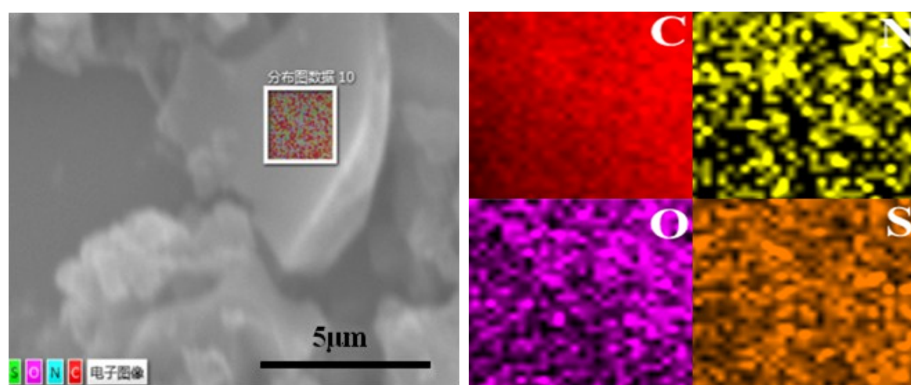

Fig. S5 SEM image of N-S-C 900 and the corresponding EDS mapping of the C, N, O and S elements.

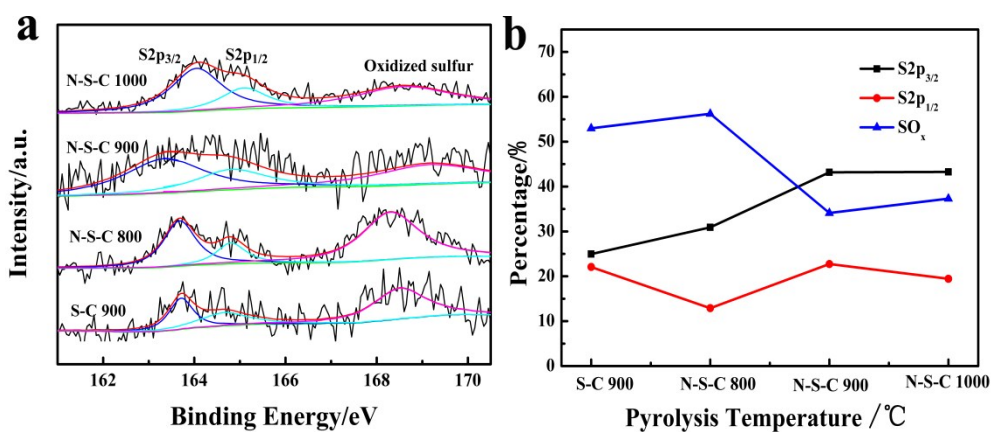

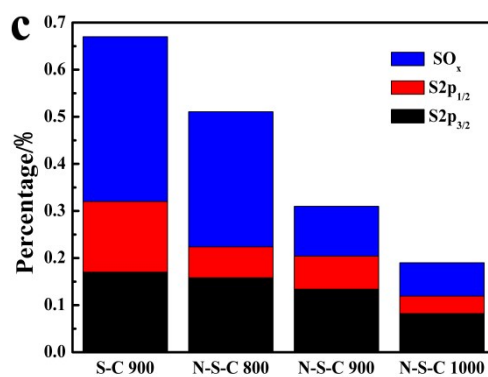

**Fig. S6** (a) High-resolution S2p XPS spectra of as-prepared catalysts. (b) The percentage of three sulfur species in sulfur. (c) The atomic percentage of three sulfur species.

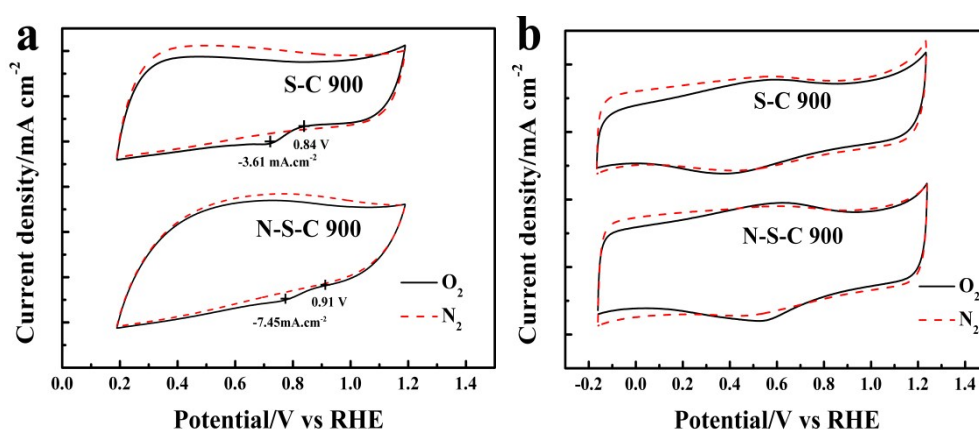

**Fig. S7** Cyclic voltammograms of as-prepared N-S-C 900 compared to S-C 900 in (a) 0.1 M KOH and (b) 0.5 M H<sub>2</sub>SO<sub>4</sub>.

**Table S1** Nitrogen sorption data of S-C 900, N-S-C 900.

| Sample    | Physical Characteristics                                           |                                                                    |                                                                    |                                                                |
|-----------|--------------------------------------------------------------------|--------------------------------------------------------------------|--------------------------------------------------------------------|----------------------------------------------------------------|
|           | S <sub>BET</sub> <sup>a</sup><br>(m <sup>2</sup> g <sup>-1</sup> ) | S <sub>mic</sub> <sup>b</sup><br>(m <sup>2</sup> g <sup>-1</sup> ) | S <sub>mes</sub> <sup>c</sup><br>(m <sup>2</sup> g <sup>-1</sup> ) | Pore volume <sup>d</sup><br>(cm <sup>3</sup> g <sup>-1</sup> ) |
| S-C 900   | 656                                                                | 602                                                                | 54                                                                 | 0.47                                                           |
| N-S-C 900 | 1209                                                               | 1035                                                               | 173                                                                | 0.74                                                           |

<sup>a</sup>Specific surface area from multiple BET method; <sup>b</sup>Micropore surface area from t-plot method; <sup>c</sup>t-method external surface area ( $S_{mes} = S_{BET} - S_{mic}$ ); <sup>d</sup>Total pore volume at  $P/P_0 = 0.99$ .

**Table S2** Summary of the porous features of carbon materials reported in literature.

| Catalyst  | S <sub>BET</sub> <sup>a</sup><br>(m <sup>2</sup> g <sup>-1</sup> ) | S <sub>mic</sub> <sup>b</sup><br>(m <sup>2</sup> g <sup>-1</sup> ) | Pore volume <sup>d</sup><br>(cm <sup>3</sup> g <sup>-1</sup> ) | References   |
|-----------|--------------------------------------------------------------------|--------------------------------------------------------------------|----------------------------------------------------------------|--------------|
| N-S-C 900 | 1209                                                               | 1035                                                               | 0.74                                                           | In this work |
| BP-800    | 1578                                                               | 1133                                                               | 1.09                                                           | S1           |

|                   |      |      |      |    |
|-------------------|------|------|------|----|
| AC900NH3          | 1694 | 1236 | 0.61 | S2 |
| NGPC-1000-10      | 932  | -    | 0.99 | S3 |
| TTF-F             | 2570 | -    | 2.14 | S4 |
| N-MCNs-7-1000 3:1 | 1171 | -    | 1.46 | S5 |

**Table S3** The physical properties of N-S-C (800, 900, 1000) and S-C 900.

| Catalyst   | Nitrogen distribution (%) |      |      |      | Total N Content (%) | Total S Content (%) | N/C ratio |
|------------|---------------------------|------|------|------|---------------------|---------------------|-----------|
|            | N1                        | N2   | N3   | N4   |                     |                     |           |
| N-S-C 800  | 1.25                      | 1.11 | 1.41 | 0.20 | 3.97                | 0.51                | 0.046     |
| N-S-C 900  | 0.37                      | 0.74 | 1.56 | 0.31 | 2.98                | 0.31                | 0.031     |
| N-S-C 1000 | 0.06                      | 0.11 | 0.39 | 0.05 | 0.61                | 0.19                | 0.0063    |
| S-C 900    | -                         | -    | -    | -    | -                   | 0.67                | -         |

**Table S4** The CHNS elemental analysis of as-prepared samples.

| Catalyst   | C     | H    | N    | S    | N/C ratio |
|------------|-------|------|------|------|-----------|
| N-S-C 800  | 70.74 | 2.51 | 6.24 | 0.74 | 0.088     |
| N-S-C 900  | 62.72 | 3.13 | 3.10 | 0.85 | 0.049     |
| N-S-C 1000 | 77.81 | 2.06 | 1.47 | 0.68 | 0.019     |
| S-C 900    | 78.63 | 2.08 | -    | 1.50 | -         |

**Table S5** Electrochemical parameters for ORR estimated from RDE polarization curves in 0.1 M KOH solution.

| Electrocatalysts | $E_{\text{onset}}$ | $E_{1/2}$ | $j_L$ (mA cm <sup>-2</sup> ) at | $J_k$ (mA cm <sup>-2</sup> ) at |
|------------------|--------------------|-----------|---------------------------------|---------------------------------|
|                  | V vs. RHE          | V vs. RHE | 0.2 V vs. RHE                   | 0.5 V vs. RHE                   |
| S-C 900          | 0.86               | 0.24      | 4.28                            | 9.6                             |
| N-S-C 800        | 0.92               | 0.78      | 5.40                            | 11.5                            |
| N-S-C 900        | 0.97               | 0.83      | 7.06                            | 49.4                            |
| N-S-C 1000       | 0.95               | 0.82      | 6.97                            | 38.4                            |
| Pt/C             | 0.97               | 0.81      | 6.09                            | 55.9                            |

**Table S6** Electrochemical parameters for ORR estimated from RDE polarization curves in 0.5 M H<sub>2</sub>SO<sub>4</sub> solution.

| Electrocatalysts | $E_{\text{onset}}$<br>V vs. RHE | $E_{1/2}$<br>V vs. RHE | $j_L$ (mA cm <sup>-2</sup> ) at<br>0.04 V vs. RHE | $J_k$ (mA cm <sup>-2</sup> ) at<br>0.34 V vs. RHE |
|------------------|---------------------------------|------------------------|---------------------------------------------------|---------------------------------------------------|
| S-C 900          | 0.57                            | 0.34                   | 3.43                                              | 1.4                                               |
| N-S-C 800        | 0.69                            | 0.44                   | 4.14                                              | 4.8                                               |
| N-S-C 900        | 0.78                            | 0.57                   | 5.82                                              | 36.6                                              |
| N-S-C 1000       | 0.75                            | 0.55                   | 5.63                                              | 33.2                                              |
| Pt/C             | 0.81                            | 0.71                   | 5.73                                              | 49.4                                              |

### ORR Activity Calculations

The kinetic parameters ( $n$  and  $J_k$ ) were analyzed by Koutecky-Levich (K-L) eq 1 and 2 as follows:

$$\frac{1}{J} = \frac{1}{J_k} + \frac{1}{J_L} = \frac{1}{NFKC_0} + \frac{1}{B\omega^{1/2}} \quad (1)$$

$$B = 0.62nFC_0(D_0)^{2/3}\nu^{-1/6} \quad (2)$$

Where  $J$  is the measured current density,  $J_k$  and  $J_L$  are the kinetic and diffusion limiting current densities, respectively,  $n$  is the overall number of electrons transferred,  $F$  is the Faraday constant,  $C_0$  is the bulk concentration of O<sub>2</sub> dissolved in the electrolyte,  $D_0$  is the O<sub>2</sub> diffusion coefficient,  $\nu$  is the kinematic viscosity of the electrolyte,  $K$  is the electron transfer rate constant, and  $\omega$  is the angular velocity of the disk ( $\omega = 2\pi N$ ,  $N$  is the linear rotation speed). The constant 0.2 is adopted when the rotating speed is expressed in rpm.

An additional rotating ring disk electrode (RRDE) experiment can be used to estimate  $n$  and further verify the ORR pathways, in which peroxide species produced during the ORR process at the disk electrode can be detected by the ring electrode. The electron transfer number and the percentage of hydrogen peroxide species can be determined by the following equations:

$$n = \frac{4I_D}{I_D + I_R / N} \quad (3)$$

$$\%HO_2^- = \frac{200 \times I_R / N}{I_D + I_R / N} \quad (4)$$

Where  $I_d$  is the disk current,  $I_r$  is the ring current, and  $N$  is the current collection efficiency of the Pt ring.

### Supporting references

S1 H. Zhu, J. Yin, X. L. Wang, H. Y. Wang, X. R. Yang, *Adv. Funct. Mater.*, 2013, **23**, 1305-1312.

S2 J. P. Li, S. G. Wang, Y. Q. Ren, Z. H. Ren, Y. J. Qiu, J. Yu, *Electrochimica Acta*, 2014, **149**, 56–64.

S3 L. J. Zhang, Z. X. Su, F. L. Jiang, L. L. Yang, J. J. Qian, Y. F. Zhou, W. M. Li, M. C. Hong, *Nanoscale*, 2014, **6**, 6590-6602.

S4 L. Hao, S. S. Zhang, R. J. Liu, J. Ning, G. J. Zhang, L. J. Zhi, *Adv. Mater.*, 2015, **27**, 3190-3195.

S5 G. Wang, Y. H. Sun, D. B. Li, H-W. Liang, R. H. Dong, X. L. Feng, K. Müllen, *Angew. Chem.*, 2015, **54**, 15191-15196.
